# Supplementary material for: Well-being app to support young people during the COVID-19 pandemic: randomised controlled trial
Source: HighWire-hosted journal article supplement (doi:10.1136/bmjopen-2021-058144), 2022-05-01
Supplement: bmjopen-2021-058144supp001_data_supplement.pdf [file bmjopen-2021-058144supp001_data_supplement.pdf]

Supplementary table 1: Within group changes in outcome measures over time

| Outcome                      | Whitu app (N=45) |                          |                  | Waitlist control (N=45) |                          |         | Group by time Interaction P value |
|------------------------------|------------------|--------------------------|------------------|-------------------------|--------------------------|---------|-----------------------------------|
|                              | Mean (SD)        | Mean difference (95% CI) | P value          | Mean (SD)               | Mean difference (95% CI) | P value |                                   |
| Emotional well-being (WHO-5) |                  |                          |                  |                         |                          |         |                                   |
| Baseline                     | 50.13 (20.42)    | Ref                      | Ref              | 46.84 (23.78)           | Ref                      | Ref     |                                   |
| 4 weeks                      | 55.28 (23.03)    | 5.19 (-1.51, 11.89)      | 0.129            | 42.13 (21.02)           | -4.71 (-11.06, 1.64)     | 0.146   | <b>0.043</b>                      |
| 3 months                     | 60.51 (18.70)    | 10.78 (4.08, 17.48)      | <b>0.0002</b>    | 47.09 (22.74)           | 0.30 (-6.10, 6.70)       | 0.927   |                                   |
| Mental well-being (SWEMBS)   |                  |                          |                  |                         |                          |         |                                   |
| Baseline                     | 22.36 (5.06)     | Ref                      | Ref              | 22.24 (5.16)            | Ref                      | Ref     |                                   |
| 4 weeks                      | 24.69 (4.98)     | 2.35 (0.95, 3.76)        | <b>0.001</b>     | 22.27 (5.04)            | 0.02 (-1.30, 1.35)       | 0.974   | <b>0.008</b>                      |
| 3 months                     | 24.58 (4.95)     | 2.33 (0.91, 3.74)        | <b>0.001</b>     | 21.70 (5.47)            | -0.57 (-1.92, 0.77)      | 0.404   |                                   |
| Depression (CES-D)           |                  |                          |                  |                         |                          |         |                                   |
| Baseline                     | 20.71 (12.56)    | Ref                      | Ref              | 22.31 (11.51)           | Ref                      | Ref     |                                   |
| 4 weeks                      | 15.72 (10.15)    | -4.29 (-7.64, -1.34)     | <b>0.005</b>     | 21.56 (11.54)           | -0.76 (-3.73, 2.22)      | 0.619   | 0.061                             |
| 3 months                     | 16.26 (9.42)     | -4.27 (-7.42, -1.12)     | <b>0.008</b>     | 23.07 (12.15)           | 0.76 (-2.22, 3.73)       | 0.619   |                                   |
| Anxiety (GAD-7)              |                  |                          |                  |                         |                          |         |                                   |
| Baseline                     | 9.38 (5.87)      | Ref                      | Ref              | 9.42 (5.36)             | Ref                      | Ref     | 0.060                             |
| 4 weeks                      | 6.54 (4.76)      | -2.71 (-4.16, -1.26)     | <b>&lt;0.001</b> | 8.56 (5.74)             | -0.87 (-2.23, 0.50)      | 0.215   |                                   |
| 3 months                     | 6.05 (4.22)      | -3.23 (-4.68, -1.78)     | <b>&lt;0.001</b> | 8.48 (5.15)             | -0.96 (-2.34, 0.42)      | 0.172   |                                   |
| Stress (PSS-10)              |                  |                          |                  |                         |                          |         |                                   |
| Baseline                     | 21.84 (7.08)     | Ref                      | Ref              | 21.62 (7.07)            | Ref                      | Ref     |                                   |
| 4 weeks                      | 16.62 (6.34)     | -5.11 (-7.14, -3.09)     | <b>&lt;0.001</b> | 21.42 (7.24)            | -0.20 (-2.11, 1.71)      | 0.838   | <b>0.001</b>                      |
| 3 months                     | 17.33 (6.32)     | -4.43 (-6.45, -2.40)     | <b>&lt;0.001</b> | 21.41 (7.29)            | -0.36 (-2.29, 1.57)      | 0.716   |                                   |

|                          |             |                   |                |     |             |                     |                |              |
|--------------------------|-------------|-------------------|----------------|-----|-------------|---------------------|----------------|--------------|
| Self-compassion (SCS-SF) |             |                   |                |     |             |                     |                |              |
| Baseline                 | 2.77 (0.68) |                   | Ref            | Ref | 2.69 (0.60) |                     | Ref            | Ref          |
| 4 weeks                  | 3.21 (0.55) | 0.46 (0.27, 0.66) | < <b>0.001</b> |     | 2.68 (0.66) | -0.01 (-0.20, 0.18) | 0.922          | <b>0.003</b> |
| 3 months                 | 3.11 (0.73) | 0.35 (0.15, 0.55) | <b>0.001</b>   |     | 2.82 (0.66) | 0.12 (-0.07, 0.31)  | 0.216          |              |
| Sleep (SQS)              |             |                   |                |     |             |                     |                |              |
| Baseline                 | 5.20 (2.05) |                   | Ref            | Ref | 4.84 (2.17) |                     | Ref            | Ref          |
| 4 weeks                  | 6.90 (1.93) | 1.75 (1.17, 2.33) | < <b>0.001</b> |     | 5.82 (2.23) | 0.98 (0.43, 1.52)   | < <b>0.001</b> | 0.141        |
| 3 months                 | 7.05 (1.85) | 1.89 (1.31, 2.46) | < <b>0.001</b> |     | 6.14 (2.31) | 1.32 (0.77, 1.87)   | < <b>0.001</b> |              |
